# Supplementary material
Source: PubMed Central journal article supplement (PMC2174786)
Supplement: NIHMS21398-supplement-supplement_1.pdf [file NIHMS21398-supplement-supplement_1.pdf]

## Supplementary data

The tables of data shown below are not normally printed in *Acta Cryst. Section C* but the data will be available electronically *via* the online contents pages at

<http://journals.iucr.org/c/journalhomepage.html>

Table S1. Fractional atomic coordinates and equivalent isotropic displacement parameters ( $\text{\AA}^2$ )

$$U_{\text{eq}} = (1/3)\sum_i\sum_j U^{ij} a^i a^j \mathbf{a}_i \cdot \mathbf{a}_j.$$

|      | <i>x</i>             | <i>y</i>            | <i>z</i>             | $U_{\text{eq}}$ |
|------|----------------------|---------------------|----------------------|-----------------|
| Cl1  | <b>0.438274</b> (19) | 0.73768 (2)         | <b>1.193378</b> (17) | 0.02273 (4)     |
| Cl2  | <b>0.107900</b> (19) | 0.61964 (2)         | <b>1.140308</b> (17) | 0.02163 (4)     |
| Zn1  | <b>0.245130</b> (9)  | <b>0.725220</b> (9) | <b>1.077569</b> (7)  | 0.01594 (3)     |
| C10  | 0.31604 (10)         | 1.31572 (10)        | 1.08649 (10)         | 0.0318 (2)      |
| H15A | 0.3788               | 1.2588              | 1.1350               | 0.048           |
| H15B | 0.3252               | 1.4069              | 1.1141               | 0.048           |
| H15C | 0.3268               | 1.3147              | 1.0158               | 0.048           |
| C5   | 0.10125 (10)         | 0.46232 (12)        | 0.62800 (8)          | 0.0311 (2)      |
| H8A  | 0.0384               | 0.5245              | 0.6358               | 0.047           |
| H8B  | 0.0624               | 0.3974              | 0.5722               | 0.047           |
| H8C  | 0.1651               | 0.5115              | 0.6084               | 0.047           |
| C4   | 0.15948 (12)         | 0.39081 (11)        | 0.73222 (8)          | 0.0325 (2)      |
| H7A  | 0.0943               | 0.3434              | 0.7528               | 0.039           |
| H7B  | 0.2187               | 0.3237              | 0.7226               | 0.039           |
| C2   | 0.34856 (9)          | 0.51359 (10)        | 0.84811 (7)          | 0.02442 (16)    |
| H5   | 0.4079               | 0.4806              | 0.8175               | 0.029           |
| C9   | 0.18834 (9)          | 1.26440 (8)         | 1.07816 (8)          | 0.02304 (16)    |
| H14A | 0.1771               | 1.2673              | 1.1494               | 0.028           |
| H14B | 0.1252               | 1.3229              | 1.0300               | 0.028           |
| C1   | 0.36898 (8)          | 0.60105 (9)         | 0.93026 (7)          | 0.02080 (14)    |
| H1   | 0.4466               | 0.6399              | 0.9677               | 0.025           |
| C7   | 0.10896 (8)          | 0.95265 (9)         | 0.93460 (6)          | 0.01937 (14)    |
| H11  | 0.0689               | 0.8971              | 0.8757               | 0.023           |
| C8   | 0.09714 (8)          | 1.08738 (9)         | 0.93754 (7)          | 0.01991 (14)    |
| H12  | 0.0483               | 1.1427              | 0.8818               | 0.024           |
| C3   | 0.17403 (8)          | 0.55125 (9)         | 0.88132 (7)          | 0.02049 (14)    |
| H9   | 0.0892               | 0.5479              | 0.8768               | 0.025           |
| N2   | 0.22464 (7)          | 0.48236 (8)         | 0.81826 (6)          | 0.02253 (14)    |
| C6   | 0.22329 (8)          | 1.01841 (8)         | 1.09103 (7)          | 0.01810 (13)    |
| H16  | 0.2783               | 1.0186              | 1.1621               | 0.022           |
| N1   | 0.25917 (6)          | 0.62447 (7)         | 0.95064 (6)          | 0.01732 (12)    |
| N3   | 0.18876 (6)          | 0.91021 (7)         | 1.03142 (6)          | 0.01733 (12)    |
| N4   | 0.16998 (7)          | 1.12751 (7)         | 1.03731 (6)          | 0.01765 (12)    |

Table S2. Anisotropic displacement parameters ( $\text{\AA}^2$ )

|     | $U_{11}$    | $U_{22}$    | $U_{33}$    | $U_{12}$     | $U_{13}$    | $U_{23}$     |
|-----|-------------|-------------|-------------|--------------|-------------|--------------|
| Cl1 | 0.01761 (9) | 0.02625 (9) | 0.02060 (9) | 0.00158 (7)  | 0.00074 (7) | -0.00132 (7) |
| Cl2 | 0.01914 (8) | 0.02213 (9) | 0.02299 (9) | -0.00118 (6) | 0.00576 (7) | 0.00514 (7)  |
| Zn1 | 0.01604 (5) | 0.01454 (5) | 0.01627 (5) | 0.00094 (3)  | 0.00371 (3) | 0.00036 (3)  |
| C10 | 0.0257 (4)  | 0.0208 (4)  | 0.0457 (6)  | -0.0032 (3)  | 0.0069 (4)  | 0.0064 (4)   |
| C5  | 0.0296 (5)  | 0.0379 (5)  | 0.0223 (4)  | 0.0050 (4)   | 0.0032 (3)  | -0.0059 (4)  |
| C4  | 0.0450 (6)  | 0.0264 (4)  | 0.0222 (4)  | -0.0041 (4)  | 0.0050 (4)  | -0.0079 (3)  |
| C2  | 0.0254 (4)  | 0.0272 (4)  | 0.0226 (4)  | 0.0045 (3)   | 0.0104 (3)  | 0.0000 (3)   |
| C9  | 0.0247 (4)  | 0.0156 (3)  | 0.0297 (4)  | 0.0006 (3)   | 0.0098 (3)  | 0.0005 (3)   |
| C1  | 0.0175 (3)  | 0.0232 (4)  | 0.0218 (4)  | 0.0009 (3)   | 0.0063 (3)  | 0.0009 (3)   |
| C7  | 0.0192 (3)  | 0.0219 (3)  | 0.0157 (3)  | 0.0010 (3)   | 0.0036 (3)  | 0.0009 (3)   |
| C8  | 0.0191 (3)  | 0.0221 (3)  | 0.0177 (3)  | 0.0032 (3)   | 0.0047 (3)  | 0.0051 (3)   |
| C3  | 0.0194 (3)  | 0.0211 (3)  | 0.0200 (3)  | -0.0013 (3)  | 0.0048 (3)  | -0.0019 (3)  |
| N2  | 0.0270 (4)  | 0.0214 (3)  | 0.0179 (3)  | -0.0001 (3)  | 0.0052 (3)  | -0.0031 (2)  |
| C6  | 0.0185 (3)  | 0.0166 (3)  | 0.0176 (3)  | 0.0011 (3)   | 0.0034 (3)  | 0.0017 (3)   |
| N1  | 0.0165 (3)  | 0.0173 (3)  | 0.0174 (3)  | 0.0005 (2)   | 0.0043 (2)  | -0.0002 (2)  |
| N3  | 0.0175 (3)  | 0.0164 (3)  | 0.0170 (3)  | 0.0011 (2)   | 0.0039 (2)  | 0.0012 (2)   |
| N4  | 0.0177 (3)  | 0.0153 (3)  | 0.0198 (3)  | 0.0016 (2)   | 0.0058 (2)  | 0.0023 (2)   |

Table S3. Geometric parameters ( $\text{\AA}$ ,  $^\circ$ )

|               |             |              |             |
|---------------|-------------|--------------|-------------|
| C11—Zn1       | 2.2519 (2)  | C2—H5        | 0.9500      |
| C12—Zn1       | 2.2531 (2)  | C9—N4        | 1.4697 (11) |
| Zn1—N3        | 1.9998 (7)  | C9—H14A      | 0.9900      |
| Zn1—N1        | 2.0087 (7)  | C9—H14B      | 0.9900      |
| C10—C9        | 1.5142 (14) | C1—N1        | 1.3803 (11) |
| C10—H15A      | 0.9800      | C1—H1        | 0.9500      |
| C10—H15B      | 0.9800      | C7—C8        | 1.3636 (12) |
| C10—H15C      | 0.9800      | C7—N3        | 1.3822 (10) |
| C5—C4         | 1.5091 (15) | C7—H11       | 0.9500      |
| C5—H8A        | 0.9800      | C8—N4        | 1.3779 (11) |
| C5—H8B        | 0.9800      | C8—H12       | 0.9500      |
| C5—H8C        | 0.9800      | C3—N1        | 1.3270 (11) |
| C4—N2         | 1.4692 (12) | C3—N2        | 1.3455 (11) |
| C4—H7A        | 0.9900      | C3—H9        | 0.9500      |
| C4—H7B        | 0.9900      | C6—N3        | 1.3281 (11) |
| C2—C1         | 1.3592 (13) | C6—N4        | 1.3434 (10) |
| C2—N2         | 1.3766 (12) | C6—H16       | 0.9500      |
| N3—Zn1—N1     | 108.50 (3)  | N4—C9—H14B   | 109.3       |
| N3—Zn1—C11    | 107.83 (2)  | C10—C9—H14B  | 109.3       |
| N1—Zn1—C11    | 106.10 (2)  | H14A—C9—H14B | 108.0       |
| N3—Zn1—C12    | 110.95 (2)  | C2—C1—N1     | 109.23 (8)  |
| N1—Zn1—C12    | 108.47 (2)  | C2—C1—H1     | 125.4       |
| C11—Zn1—C12   | 114.742 (9) | N1—C1—H1     | 125.4       |
| C9—C10—H15A   | 109.5       | C8—C7—N3     | 108.82 (7)  |
| C9—C10—H15B   | 109.5       | C8—C7—H11    | 125.6       |
| H15A—C10—H15B | 109.5       | N3—C7—H11    | 125.6       |
| C9—C10—H15C   | 109.5       | C7—C8—N4     | 106.46 (7)  |
| H15A—C10—H15C | 109.5       | C7—C8—H12    | 126.8       |
| H15B—C10—H15C | 109.5       | N4—C8—H12    | 126.8       |
| C4—C5—H8A     | 109.5       | N1—C3—N2     | 110.54 (8)  |
| C4—C5—H8B     | 109.5       | N1—C3—H9     | 124.7       |
| H8A—C5—H8B    | 109.5       | N2—C3—H9     | 124.7       |
| C4—C5—H8C     | 109.5       | C3—N2—C2     | 107.82 (7)  |
| H8A—C5—H8C    | 109.5       | C3—N2—C4     | 126.27 (9)  |
| H8B—C5—H8C    | 109.5       | C2—N2—C4     | 125.90 (8)  |
| N2—C4—C5      | 112.12 (9)  | N3—C6—N4     | 110.87 (7)  |
| N2—C4—H7A     | 109.2       | N3—C6—H16    | 124.6       |
| C5—C4—H7A     | 109.2       | N4—C6—H16    | 124.6       |
| N2—C4—H7B     | 109.2       | C3—N1—C1     | 106.28 (7)  |
| C5—C4—H7B     | 109.2       | C3—N1—Zn1    | 128.53 (6)  |
| H7A—C4—H7B    | 107.9       | C1—N1—Zn1    | 124.40 (6)  |
| C1—C2—N2      | 106.13 (8)  | C6—N3—C7     | 106.31 (7)  |
| C1—C2—H5      | 126.9       | C6—N3—Zn1    | 125.11 (6)  |
| N2—C2—H5      | 126.9       | C7—N3—Zn1    | 128.58 (6)  |
| N4—C9—C10     | 111.60 (8)  | C6—N4—C8     | 107.54 (7)  |
| N4—C9—H14A    | 109.3       | C6—N4—C9     | 125.67 (7)  |
| C10—C9—H14A   | 109.3       | C8—N4—C9     | 126.78 (7)  |
